# Supplementary material for: Synthesis of Polyhydroxybutyrate Particles with Micro-to-Nanosized Structures and Application as Protective Coating for Packaging Papers
Source: MDPI journal article supplement (doi:10.3390/nano7010005), 2016-12-30
Supplement: s1 [file s1]

# Supplementary Materials: Synthesis of Polyhydroxybutyrate Particles with Micro-to-Nanosized Structures and Application as Protective Coating for Packaging Papers

Vibhore Kumar Rastogi and Pieter Samyn

Figure S1 illustrates the magnified SEM image of PHB-SP-coated (no NFC) paper sized with plant wax solution, where no micro-/nano-scale fractal wax structures are observed.

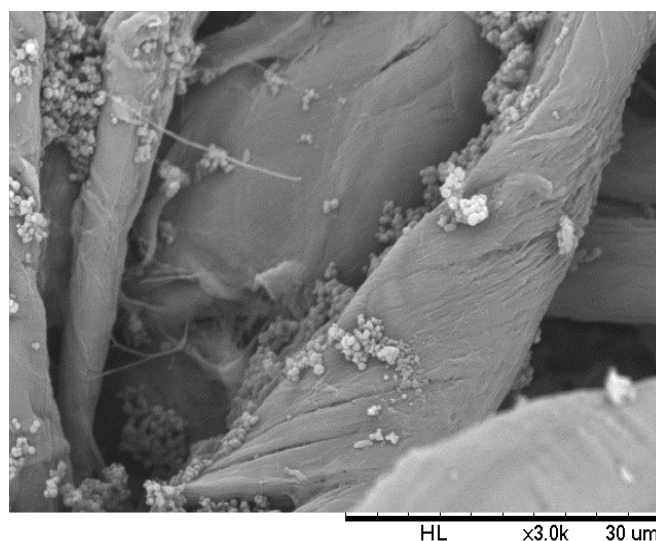

**Figure S1.** Scanning electron micrograph of PHB-SP-coated (no NFC) paper, showing no indications for the presence of micro-/nano-fractal wax structures.

Figure S2 illustrates the magnified SEM image of PHB-SP/NFC-coated (7 wt %) paper (prior to wax coating) that has been washed several times with water and resulted in the removal of most of the PHB-SP particles from the paper surface.

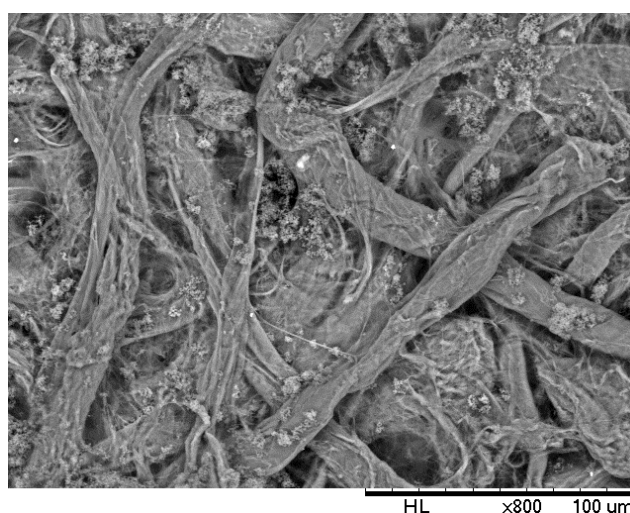

**Figure S2.** Scanning electron micrograph of washed PHB-SP/NFC-coated (7 wt %) paper, showing the retention of few PHB-SP particles after washing.

Figure S3 illustrates the magnified SEM images of PHB-SP/NFC-coated (7 wt %) paper (prior to wax coating) that has been first thermally cured at 150 °C and 180 °C for 30 min and later washed

with water several times. Curing at 150 °C resulted in improvement in the adhesion of PHB-SP directly over the paper fibers due to the interaction between melted PHB and fibers, but at the same time disturbed the nanoscale surface morphology due to uneven melting of PHB-SP, attributed to the differences in the particle sizes. However, curing at higher temperature of 180 °C resulted in almost even melting of PHB-SP along with better adhesion to paper fibers, but the favorable nanoscale surface morphology was then lost, responsible for the higher hydrophobicity.

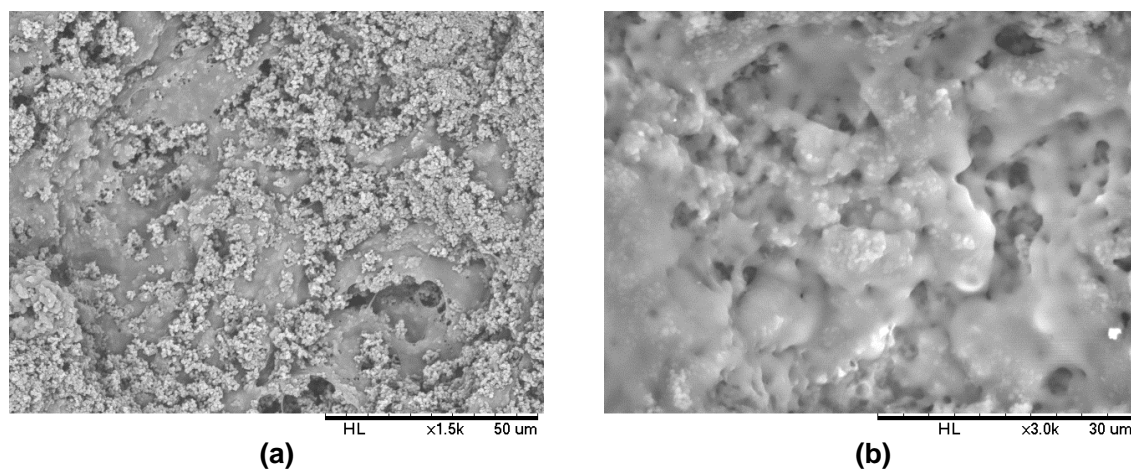

**Figure S3.** Scanning electron micrograph of washed PHB-SP/NFC-coated (7 wt %) paper thermally cured at (a) 150 °C for 30 min and (b) 180 °C for 30 min.

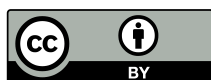

© 2016 by the authors. Submitted for possible open access publication under the terms and conditions of the Creative Commons Attribution (CC-BY) license (<http://creativecommons.org/licenses/by/4.0/>).
